# Supplementary material for: Plant-Based Dietary Patterns and Breast Cancer Recurrence and Survival in the Pathways Study
Source: MDPI journal article supplement (doi:10.3390/nu13103374), 2021-09-25
Supplement: s1 [file s1]

# Anyene et al. Plant-based dietary patterns and breast cancer recurrence and survival in the Pathways Study

## Supplementary Materials

**Table S1:** Scoring methods and examples of food items comprising the 18 food groups that contribute to PDI, hPDI, and uPDI scores.

| Food Groups               |                                                                                              | Example food descriptions | Scoring Method |          |      |
|---------------------------|----------------------------------------------------------------------------------------------|---------------------------|----------------|----------|------|
|                           |                                                                                              |                           | PDI            | hPDI     | uPDI |
| Healthful Plant Foods     |                                                                                              |                           |                |          |      |
| Whole grains              | Whole grains such as breakfast cereal, brown rice, and oatmeal                               | Positive                  | Positive       | Reverse  |      |
| Fruits                    | Whole fruits such as bananas, apples, oranges, and blueberries                               | Positive                  | Positive       | Reverse  |      |
| Vegetables                | Dark green, red-orange, and starchy vegetables such as tomatoes, broccoli, carrots, and yams | Positive                  | Positive       | Reverse  |      |
| Nuts                      | Peanuts, tree nuts, and seeds                                                                | Positive                  | Positive       | Reverse  |      |
| Legumes                   | Legumes such as beans, lentils, and peas                                                     | Positive                  | Positive       | Reverse  |      |
| Vegetable oils            | Salad dressing: oil and vinegar, canola oil, olive oil, and Crisco                           | Positive                  | Positive       | Reverse  |      |
| Tea & Coffee              | Regular coffee, decaf coffee; green, black, and herbal teas                                  | Positive                  | Positive       | Reverse  |      |
| Unhealthful Plant Food    |                                                                                              |                           |                |          |      |
| Fruit juices              | Citrus and non-citrus fruit juices such as orange juice and apple juice                      | Positive                  | Reverse        | Positive |      |
| Refined grains            | Refined grains such as bagels, muffins, white rice, and white bread                          | Positive                  | Reverse        | Positive |      |
| Potatoes                  | White potatoes in forms such as french fries, baked potatoes, etc.                           | Positive                  | Reverse        | Positive |      |
| Sugar-sweetened beverages | Sodas, carbonated beverages with sugar, etc.                                                 | Positive                  | Reverse        | Positive |      |
| Sweets and desserts       | Sweet beverages (excl. juice), pancakes, pastries, and desserts                              | Positive                  | Reverse        | Positive |      |
| Animal Food               |                                                                                              |                           |                |          |      |
| Animal fat                | Products such as butter, ghee, margarine, and bacon fat                                      | Reverse                   | Reverse        | Reverse  |      |
| Dairy                     | Yogurt, ice cream, whole milk, cheese, etc.                                                  | Reverse                   | Reverse        | Reverse  |      |
| Egg                       | Eggs and egg substitutes                                                                     | Reverse                   | Reverse        | Reverse  |      |
| Fish or Seafood           | Finfish, shellfish, shrimp, and other seafood                                                | Reverse                   | Reverse        | Reverse  |      |
| Meat                      | Chicken, turkey, Cornish hens, duck, goose, processed meats, etc.                            | Reverse                   | Reverse        | Reverse  |      |
| Misc. animal-based foods  | Pizza, cream soups like chowders, mayonnaise, and sandwich spreads                           | Reverse                   | Reverse        | Reverse  |      |

PDI, hPDI, and uPDI are derived using the 18 food groups listed above. A participant's total serving size consumption for each food group is broken into cohort-specific quintiles, and each quintile is given a score between 1 and 5. Each food group uses positive or reverse scores depending on the index of interest. For positive scores, those in the highest cohort-specific quintile for consumption receive a score of 5 and in the lowest receive a score of 1. For reverse scores, those in the highest cohort-specific quintile for consumption receive a score of 1. A participant's total score for each index is calculated by summing up their scores across food groups. This is adapted from the methodology defined by Satija et al (2016).

### Reference:

Satija, A., Bhupathiraju, S.N., Rimm, E.B., Spiegelman, D., Chiuve, S.E., Borgi, L., Willett, W.C., Manson, J.E., Sun, Q., Hu, F.B. Plant-Based Dietary Patterns and Incidence of Type 2 Diabetes in US Men and Women: Results from Three Prospective Cohort Studies. *PLoS medicine* **2016**, *13*, e1002039, doi:10.1371/journal.pmed.1002039.

Anyene et al. Plant-based dietary patterns and breast cancer recurrence and survival in the Pathways Study

**Table S2.** Baseline characteristics of participants by healthful plant-based diet index (hPDI) quintiles, Pathways Study.

| Characteristic                      | Overall                | Quintiles of hPDI score                   |                                           |                                           |                                           |                                           |
|-------------------------------------|------------------------|-------------------------------------------|-------------------------------------------|-------------------------------------------|-------------------------------------------|-------------------------------------------|
|                                     | N = 3,646 <sup>1</sup> | Q1, N = 799 <sup>1</sup><br>Scores: 31-47 | Q2, N = 734 <sup>1</sup><br>Scores: 48-52 | Q3, N = 675 <sup>1</sup><br>Scores: 53-56 | Q4, N = 728 <sup>1</sup><br>Scores: 57-61 | Q5, N = 710 <sup>1</sup><br>Scores: 62-81 |
| <b>Age at diagnosis</b>             | 60 (12)                | 58 (12)                                   | 59 (12)                                   | 60 (12)                                   | 61 (11)                                   | 61 (11)                                   |
| <b>BMI (kg/m2)</b>                  | 28 (7)                 | 30 (8)                                    | 29 (7)                                    | 29 (7)                                    | 28 (6)                                    | 27 (6)                                    |
| <b>Physical Activity (MET h/wk)</b> | 54 (36)                | 46 (31)                                   | 52 (36)                                   | 54 (34)                                   | 52 (34)                                   | 65 (41)                                   |
| <b>Energy intake (kcal/d)</b>       | 1,465 (568)            | 1,786 (629)                               | 1,506 (522)                               | 1,398 (536)                               | 1,345 (514)                               | 1,250 (451)                               |
| <b>Race/Ethnicity</b>               |                        |                                           |                                           |                                           |                                           |                                           |
| White                               | 2,481 (68%)            | 487 (61%)                                 | 489 (67%)                                 | 471 (70%)                                 | 527 (72%)                                 | 507 (71%)                                 |
| Black                               | 237 (6.5%)             | 105 (13%)                                 | 38 (5.2%)                                 | 35 (5.2%)                                 | 26 (3.6%)                                 | 33 (4.6%)                                 |
| Asian/ Pacific Islander             | 474 (13%)              | 106 (13%)                                 | 102 (14%)                                 | 76 (11%)                                  | 90 (12%)                                  | 100 (14%)                                 |
| Hispanic                            | 378 (10%)              | 82 (10%)                                  | 86 (12%)                                  | 77 (11%)                                  | 70 (9.6%)                                 | 63 (8.9%)                                 |
| American Indian/ Alaska Native      | 76 (2.1%)              | 19 (2.4%)                                 | 19 (2.6%)                                 | 16 (2.4%)                                 | 15 (2.1%)                                 | 7 (1.0%)                                  |
| <b>Education</b>                    |                        |                                           |                                           |                                           |                                           |                                           |
| High school or less                 | 544 (15%)              | 151 (19%)                                 | 112 (15%)                                 | 103 (15%)                                 | 92 (13%)                                  | 86 (12%)                                  |
| Some college                        | 1,241 (34%)            | 309 (39%)                                 | 269 (37%)                                 | 232 (34%)                                 | 228 (31%)                                 | 203 (29%)                                 |
| College graduate                    | 1,022 (28%)            | 226 (28%)                                 | 193 (26%)                                 | 194 (29%)                                 | 203 (28%)                                 | 206 (29%)                                 |
| Postgraduate                        | 839 (23%)              | 113 (14%)                                 | 160 (22%)                                 | 146 (22%)                                 | 205 (28%)                                 | 215 (30%)                                 |
| <b>Menopausal Status</b>            |                        |                                           |                                           |                                           |                                           |                                           |
| Premenopausal                       | 1,057 (29%)            | 283 (35%)                                 | 234 (32%)                                 | 198 (29%)                                 | 176 (24%)                                 | 166 (23%)                                 |
| Postmenopausal                      | 2,589 (71%)            | 516 (65%)                                 | 500 (68%)                                 | 477 (71%)                                 | 552 (76%)                                 | 544 (77%)                                 |
| <b>Smoking status</b>               |                        |                                           |                                           |                                           |                                           |                                           |
| Never                               | 2,091 (57%)            | 433 (54%)                                 | 421 (57%)                                 | 403 (60%)                                 | 424 (58%)                                 | 410 (58%)                                 |
| Former                              | 1,403 (38%)            | 309 (39%)                                 | 289 (39%)                                 | 239 (35%)                                 | 279 (38%)                                 | 287 (40%)                                 |
| Current                             | 152 (4.2%)             | 57 (7.1%)                                 | 24 (3.3%)                                 | 33 (4.9%)                                 | 25 (3.4%)                                 | 13 (1.8%)                                 |
| <b>AJCC Cancer Stage</b>            |                        |                                           |                                           |                                           |                                           |                                           |
| 1                                   | 1,998 (55%)            | 402 (50%)                                 | 393 (54%)                                 | 342 (51%)                                 | 433 (59%)                                 | 428 (60%)                                 |
| 2                                   | 1,247 (34%)            | 291 (36%)                                 | 252 (34%)                                 | 256 (38%)                                 | 236 (32%)                                 | 212 (30%)                                 |
| 3                                   | 346 (9.5%)             | 93 (12%)                                  | 70 (9.5%)                                 | 67 (9.9%)                                 | 55 (7.6%)                                 | 61 (8.6%)                                 |
| 4                                   | 55 (1.5%)              | 13 (1.6%)                                 | 19 (2.6%)                                 | 10 (1.5%)                                 | 4 (0.5%)                                  | 9 (1.3%)                                  |
| <b>ER Status</b>                    |                        |                                           |                                           |                                           |                                           |                                           |
| Positive                            | 3,063 (84%)            | 654 (82%)                                 | 614 (84%)                                 | 571 (85%)                                 | 626 (86%)                                 | 598 (84%)                                 |
| Negative                            | 583 (16%)              | 145 (18%)                                 | 120 (16%)                                 | 104 (15%)                                 | 102 (14%)                                 | 112 (16%)                                 |
| <b>HER2 Status</b>                  |                        |                                           |                                           |                                           |                                           |                                           |
| Positive                            | 469 (13%)              | 116 (15%)                                 | 88 (12%)                                  | 88 (13%)                                  | 89 (12%)                                  | 88 (12%)                                  |
| Negative                            | 3,037 (83%)            | 662 (83%)                                 | 617 (84%)                                 | 562 (83%)                                 | 611 (84%)                                 | 585 (82%)                                 |
| Missing                             | 140 (3.8%)             | 21 (2.6%)                                 | 29 (4.0%)                                 | 25 (3.7%)                                 | 28 (3.8%)                                 | 37 (5.2%)                                 |

<sup>1</sup>Mean (SD); n (%)

hPDI = healthful plant-based diet index; BMI = body mass index; MET (h/wk) = metabolic equivalent of task hours/week; ER = estrogen receptor; HER2 = human epidermal growth factor receptor 2

Anyene et al. Plant-based dietary patterns and breast cancer recurrence and survival in the Pathways Study

**Table S3.** Baseline characteristics of participants by unhealthful plant-based diet index (uPDI) quintiles, Pathways Study.

| Characteristic                      | Overall                | Quintiles of uPDI score                   |                                           |                                           |                                           |                                           |
|-------------------------------------|------------------------|-------------------------------------------|-------------------------------------------|-------------------------------------------|-------------------------------------------|-------------------------------------------|
|                                     | N = 3,646 <sup>1</sup> | Q1, N = 837 <sup>1</sup><br>Scores: 27-47 | Q2, N = 752 <sup>1</sup><br>Scores: 48-52 | Q3, N = 687 <sup>1</sup><br>Scores: 53-56 | Q4, N = 711 <sup>1</sup><br>Scores: 57-61 | Q5, N = 659 <sup>1</sup><br>Scores: 62-77 |
| <b>Age at diagnosis</b>             | 60 (12)                | 61 (11)                                   | 61 (12)                                   | 60 (12)                                   | 58 (12)                                   | 58 (12)                                   |
| <b>BMI (kg/m2)</b>                  | 28 (7)                 | 27 (6)                                    | 28 (6)                                    | 29 (7)                                    | 29 (7)                                    | 30 (8)                                    |
| <b>Physical Activity (MET h/wk)</b> | 54 (36)                | 64 (41)                                   | 52 (32)                                   | 54 (36)                                   | 52 (34)                                   | 46 (31)                                   |
| <b>Energy intake (kcal/d)</b>       | 1,465 (568)            | 1,257 (458)                               | 1,349 (511)                               | 1,417 (535)                               | 1,567 (554)                               | 1,805 (627)                               |
| <b>Race/Ethnicity</b>               |                        |                                           |                                           |                                           |                                           |                                           |
| White                               | 2,481 (68%)            | 604 (72%)                                 | 530 (70%)                                 | 495 (72%)                                 | 459 (65%)                                 | 393 (60%)                                 |
| Black                               | 237 (6.5%)             | 35 (4.2%)                                 | 33 (4.4%)                                 | 28 (4.1%)                                 | 48 (6.8%)                                 | 93 (14%)                                  |
| Asian/ Pacific Islander             | 474 (13%)              | 116 (14%)                                 | 94 (12%)                                  | 70 (10%)                                  | 105 (15%)                                 | 89 (14%)                                  |
| Hispanic                            | 378 (10%)              | 74 (8.8%)                                 | 75 (10.0%)                                | 81 (12%)                                  | 79 (11%)                                  | 69 (10%)                                  |
| American Indian/ Alaska Native      | 76 (2.1%)              | 8 (1.0%)                                  | 20 (2.7%)                                 | 13 (1.9%)                                 | 20 (2.8%)                                 | 15 (2.3%)                                 |
| <b>Education</b>                    |                        |                                           |                                           |                                           |                                           |                                           |
| High school or less                 | 544 (15%)              | 95 (11%)                                  | 111 (15%)                                 | 94 (14%)                                  | 116 (16%)                                 | 128 (19%)                                 |
| Some college                        | 1,241 (34%)            | 241 (29%)                                 | 241 (32%)                                 | 251 (37%)                                 | 255 (36%)                                 | 253 (38%)                                 |
| College graduate                    | 1,022 (28%)            | 248 (30%)                                 | 200 (27%)                                 | 194 (28%)                                 | 188 (26%)                                 | 192 (29%)                                 |
| Postgraduate                        | 839 (23%)              | 253 (30%)                                 | 200 (27%)                                 | 148 (22%)                                 | 152 (21%)                                 | 86 (13%)                                  |
| <b>Menopausal Status</b>            |                        |                                           |                                           |                                           |                                           |                                           |
| Premenopausal                       | 1,057 (29%)            | 195 (23%)                                 | 192 (26%)                                 | 190 (28%)                                 | 241 (34%)                                 | 239 (36%)                                 |
| Postmenopausal                      | 2,589 (71%)            | 642 (77%)                                 | 560 (74%)                                 | 497 (72%)                                 | 470 (66%)                                 | 420 (64%)                                 |
| <b>Smoking status</b>               |                        |                                           |                                           |                                           |                                           |                                           |
| Never                               | 2,091 (57%)            | 486 (58%)                                 | 431 (57%)                                 | 410 (60%)                                 | 412 (58%)                                 | 352 (53%)                                 |
| Former                              | 1,403 (38%)            | 334 (40%)                                 | 296 (39%)                                 | 244 (36%)                                 | 272 (38%)                                 | 257 (39%)                                 |
| Current                             | 152 (4.2%)             | 17 (2.0%)                                 | 25 (3.3%)                                 | 33 (4.8%)                                 | 27 (3.8%)                                 | 50 (7.6%)                                 |
| <b>AJCC Cancer Stage</b>            |                        |                                           |                                           |                                           |                                           |                                           |
| 1                                   | 1,998 (55%)            | 506 (60%)                                 | 433 (58%)                                 | 352 (51%)                                 | 375 (53%)                                 | 332 (50%)                                 |
| 2                                   | 1,247 (34%)            | 247 (30%)                                 | 258 (34%)                                 | 253 (37%)                                 | 251 (35%)                                 | 238 (36%)                                 |
| 3                                   | 346 (9.5%)             | 74 (8.8%)                                 | 55 (7.3%)                                 | 72 (10%)                                  | 68 (9.6%)                                 | 77 (12%)                                  |
| 4                                   | 55 (1.5%)              | 10 (1.2%)                                 | 6 (0.8%)                                  | 10 (1.5%)                                 | 17 (2.4%)                                 | 12 (1.8%)                                 |
| <b>ER Status</b>                    |                        |                                           |                                           |                                           |                                           |                                           |
| Positive                            | 3,063 (84%)            | 711 (85%)                                 | 637 (85%)                                 | 591 (86%)                                 | 589 (83%)                                 | 535 (81%)                                 |
| Negative                            | 583 (16%)              | 126 (15%)                                 | 115 (15%)                                 | 96 (14%)                                  | 122 (17%)                                 | 124 (19%)                                 |
| <b>HER2 Status</b>                  |                        |                                           |                                           |                                           |                                           |                                           |
| Positive                            | 469 (13%)              | 102 (12%)                                 | 90 (12%)                                  | 83 (12%)                                  | 102 (14%)                                 | 92 (14%)                                  |
| Negative                            | 3,037 (83%)            | 690 (82%)                                 | 638 (85%)                                 | 575 (84%)                                 | 584 (82%)                                 | 550 (83%)                                 |
| Missing                             | 140 (3.8%)             | 45 (5.4%)                                 | 24 (3.2%)                                 | 29 (4.2%)                                 | 25 (3.5%)                                 | 17 (2.6%)                                 |

<sup>1</sup>Mean (SD); n (%)

uPDI = unhealthful plant-based diet index; BMI = body mass index; MET (h/wk) = metabolic equivalent of task hours/week; ER = estrogen receptor; HER2 = human epidermal growth factor receptor 2
